# Supplementary material
Source: PubMed Central journal article supplement (PMC3033011)
Supplement: NIHMS215650-supplement-2.pdf [file NIHMS215650-supplement-2.pdf]

---

OMB 0925-XXXX

Expires: XX/XX/XXXX

Liquidator's identification number: |\_| |\_|\_|\_|

## STUDY OF THE HEALTH STATUS OF LIQUIDATORS

### Spouse (or Relative) Questionnaire

08/2001

Public reporting for this collection of information is estimated to average ½ hour per response, including the time for reviewing instructions, searching existing data sources, gathering and maintaining the data needed, and completing and reviewing the collection of information. An agency may not conduct or sponsor, and a person is not required to respond to, a collection of information unless it displays a currently valid OMB control number. Send comments regarding this burden to: NIH, Project Clearance Office, 6705 Rockledge Drive, MSC 7974, Bethesda, MD 20892-7974, ATTN: PRA (0925-0401). Do not return the completed form to this address.

---

**Information on the liquidator from the Chornobyl Registry**

|                                                 | Chornobyl Registry                              | Corrections, if applicable                      |
|-------------------------------------------------|-------------------------------------------------|-------------------------------------------------|
| 0.1 Last name                                   | _____                                           | _____                                           |
| 0.2 First name                                  | _____                                           | _____                                           |
| 0.3 Patronymic name                             | _____                                           | _____                                           |
| 0.4 Date of birth                               | day  __ __  month  __ __  19 __ __              | day  __ __  month  __ __  19 __ __              |
| 0.5 Type of document used for proof of identity |                                                 |                                                 |
|                                                 | 1 <input type="checkbox"/> passport             | 1 <input type="checkbox"/> passport             |
|                                                 | 2 <input type="checkbox"/> military passport    | 2 <input type="checkbox"/> military passport    |
|                                                 | 3 <input type="checkbox"/> other, specify _____ | 3 <input type="checkbox"/> other, specify _____ |
|                                                 | _____                                           | _____                                           |
| Serial number                                   | _____                                           | _____                                           |
| Number                                          | _ _ _ _ _ _ _ _ _                               | _ _ _ _ _ _ _ _ _                               |
| 0.6 Home address                                |                                                 |                                                 |
| ZIP code                                        | _ _ _ _ _ _ _                                   | _ _ _ _ _ _ _                                   |
| oblast, region                                  | _____                                           | _____                                           |
| raion                                           | _____                                           | _____                                           |
| <i>if in city:</i>                              |                                                 |                                                 |
| city                                            | _____                                           | _____                                           |
| street                                          | _____                                           | _____                                           |
| street #                                        | _ _ _                                           | _ _ _                                           |
| apartment #                                     | _ _ _                                           | _ _ _                                           |
| <i>if in countryside:</i>                       |                                                 |                                                 |
| agricultural sovet                              | _____                                           | _____                                           |
| settlement                                      | _____                                           | _____                                           |
| 0.7 telephone number:                           |                                                 |                                                 |
|                                                 | at work  _ _ _ _ _ _ _ _ _                      | at work  _ _ _ _ _ _ _ _ _                      |
|                                                 | at home  _ _ _ _ _ _ _ _ _                      | at home  _ _ _ _ _ _ _ _ _                      |

---

**Last, first and patronymic names of interviewer** \_\_\_\_\_

**Date of interview:** day |\_\_|\_\_| month |\_\_|\_\_| year 20|\_\_|\_\_|

**Time interview began:** hours |\_\_|\_\_| minutes |\_\_|\_\_|

**Identity of respondent:**

- 1  liquidator's wife
- 2  his brother or sister
- 3  his daughter or son
- 4  Some other relative, specify \_\_\_\_\_

*Please indicate last, first and patronymic name of respondent*

---

*and check the reason why the respondent replaced the liquidator :*

- 1  deceased
- 2  too ill to answer
- 3  long-term mission
- 4  other, specify \_\_\_\_\_



---

For each time your husband (brother, sister, father) worked in the 30-km zone, please tell me the name of the organization for which he worked, and the name and address of colleagues with whom he worked in the 30-km zone:

# of mission \_\_\_\_\_ Name of Organization \_\_\_\_\_

Colleagues:  
Last, first and patronymic names \_\_\_\_\_ Address, telephone number \_\_\_\_\_  
\_\_\_\_\_  
\_\_\_\_\_

# of mission \_\_\_\_\_ Name of Organization \_\_\_\_\_

Colleagues:  
Last, first and patronymic names \_\_\_\_\_ Address, telephone number \_\_\_\_\_  
\_\_\_\_\_  
\_\_\_\_\_

# of mission \_\_\_\_\_ Name of Organization \_\_\_\_\_

Colleagues:  
Last, first and patronymic names \_\_\_\_\_ Address, telephone number \_\_\_\_\_  
\_\_\_\_\_  
\_\_\_\_\_

*(use extra pages if necessary)*

## 2. General information about occupational history

I would like to ask you now several questions about his occupational history and possible hazardous working conditions if applicable.

2.1 What was the occupational group of your husband (brother, sister, father) after his work at the ChNPP (*check one*)?

- |                                                |                                                                        |
|------------------------------------------------|------------------------------------------------------------------------|
| 1 <input type="checkbox"/> student             | 5 <input type="checkbox"/> self employed                               |
| 2 <input type="checkbox"/> agricultural worker | 6 <input type="checkbox"/> unemployed                                  |
| 3 <input type="checkbox"/> industrial worker   | 7 <input type="checkbox"/> not working due to disability or retirement |
| 4 <input type="checkbox"/> office worker       | 9 <input type="checkbox"/> other, specify _____                        |

2.2 What was the occupational group of your husband (brother, sister, father) before the Chernobyl accident (*check one*)?

- |                                                |                                                                        |
|------------------------------------------------|------------------------------------------------------------------------|
| 1 <input type="checkbox"/> student             | 5 <input type="checkbox"/> self employed                               |
| 2 <input type="checkbox"/> agricultural worker | 6 <input type="checkbox"/> unemployed                                  |
| 3 <input type="checkbox"/> industrial worker   | 7 <input type="checkbox"/> not working due to disability or retirement |
| 4 <input type="checkbox"/> office worker       | 9 <input type="checkbox"/> other, specify _____                        |

2.3 Did your husband (brother, sister, father) ever work with radiation (other than the time he spent in the Chernobyl area) (*check one*)?

- 1  yes  
 2  no  
 9  don't remember

if yes, please indicate the professional activity, dates of employment, and name and location of organization where he worked (*check "no" or "yes" for each type of professional activity*).

| Professional activity               | Period of employment, month/year                            | Organization (name, location) |
|-------------------------------------|-------------------------------------------------------------|-------------------------------|
| Medicine                            | 1 <input type="checkbox"/> yes from _ _ / _ _  to _ _ / _ _ | _____                         |
|                                     | from _ _ / _ _  to _ _ / _ _                                | _____                         |
|                                     | from _ _ / _ _  to _ _ / _ _                                | _____                         |
|                                     | 2 <input type="checkbox"/> no                               |                               |
| Nuclear industry<br>(including NPP) | 1 <input type="checkbox"/> yes from _ _ / _ _  to _ _ / _ _ | _____                         |
|                                     | from _ _ / _ _  to _ _ / _ _                                | _____                         |
|                                     | from _ _ / _ _  to _ _ / _ _                                | _____                         |
|                                     | 2 <input type="checkbox"/> no                               |                               |
| Industrial radiography              | 1 <input type="checkbox"/> yes from _ _ / _ _  to _ _ / _ _ | _____                         |
|                                     | from _ _ / _ _  to _ _ / _ _                                | _____                         |
|                                     | from _ _ / _ _  to _ _ / _ _                                | _____                         |
|                                     | 2 <input type="checkbox"/> no                               |                               |
| Army service, other than<br>above   | 1 <input type="checkbox"/> yes from _ _ / _ _  to _ _ / _ _ | _____                         |
|                                     | from _ _ / _ _  to _ _ / _ _                                | _____                         |
|                                     | from _ _ / _ _  to _ _ / _ _                                | _____                         |
|                                     |                                                             |                               |

| Professional activity | Period of employment, month/year                           | Organization (name, location) |
|-----------------------|------------------------------------------------------------|-------------------------------|
|                       | 2 <input type="checkbox"/> no                              |                               |
| Other, specify        | 1 <input type="checkbox"/> yes from _ _ / _ _ to _ _ / _ _ | _____                         |
| _____                 | from _ _ / _ _ to _ _ / _ _                                | _____                         |
| _____                 | from _ _ / _ _ to _ _ / _ _                                | _____                         |
|                       | 2 <input type="checkbox"/> no                              |                               |

2.4 Did your husband (brother, sister, father) ever work in one of the following hazardous industries (show the list of hazardous industries to the respondent), including army service (check one)?

- 1  yes
- 2  no
- 9  don't remember

if yes, please indicate the type of industry, dates of employment, position, name and location of organization where he worked.

| Type of industry | Period of employment, month/year | Organization (name, location) |
|------------------|----------------------------------|-------------------------------|
| _____            | from _ _ / _ _ to _ _ / _ _      | _____                         |
| _____            | _____                            | _____                         |
| _____            | from _ _ / _ _ to _ _ / _ _      | _____                         |
| _____            | _____                            | _____                         |
| _____            | from _ _ / _ _ to _ _ / _ _      | _____                         |
| _____            | _____                            | _____                         |
| _____            | from _ _ / _ _ to _ _ / _ _      | _____                         |
| _____            | _____                            | _____                         |

2.5 Did your husband (brother, sister, father) ever work with hazardous chemicals (show the list of hazardous chemicals to the respondent and check one)?

- 1  yes
- 2  no
- 9  don't remember

if yes, please indicate chemical, dates of employment, name and location of organization where it worked.

| Chemical | Period of employment, month/year | Organization (name, location) |
|----------|----------------------------------|-------------------------------|
| _____    | from _ _ / _ _ to _ _ / _ _      | _____                         |
| _____    | _____                            | _____                         |

| Chemical | Period of employment, month/year | Organization (name, location) |
|----------|----------------------------------|-------------------------------|
| _____    | from _ _ / _ _ to _ _ / _ _      | _____                         |
| _____    | _____                            | _____                         |
| _____    | from _ _ / _ _ to _ _ / _ _      | _____                         |
| _____    | _____                            | _____                         |
| _____    | from _ _ / _ _ to _ _ / _ _      | _____                         |
| _____    | _____                            | _____                         |

### 3. Medical history

Please try to remember if your husband (brother, sister, father) ever had the following diseases.

3.1 Did your husband (brother, sister, father) ever have a thyroid disease?

- 1  yes
- 2  no
- 9  don't remember

If "yes", please indicate the following:

| Diagnosis               | Year of diagnosis | Name of hospital, address (oblast, raion) |
|-------------------------|-------------------|-------------------------------------------|
| Goiter                  | 19 _ _            | _____                                     |
| Thyroid nodules         | 19 _ _            | _____                                     |
| Hypothyroidism          | 19 _ _            | _____                                     |
| Hyperthyroidism         | 19 _ _            | _____                                     |
| Thyroiditis             | 19 _ _            | _____                                     |
| Other, specify<br>_____ | 19 _ _            | _____                                     |

3.2 Has a doctor ever told your husband (brother, sister, father) that he had a tumour (benign or malignant) or leukemia (*check one*)?

- 1  yes
- 2  no
- 9  don't remember

If "yes", please specify (*indicate for each of them separately: primary localisation, hospital of diagnosis, year of diagnosis and check type of treatment received*).

a. First tumour

Localisation \_\_\_\_\_

Hospital \_\_\_\_\_

Year of diagnosis \_\_\_\_\_ 19|\_|\_|

| Treatment            | Yes                        | No                         | Don't know                 |
|----------------------|----------------------------|----------------------------|----------------------------|
| Radiotherapy         | 1 <input type="checkbox"/> | 2 <input type="checkbox"/> | 9 <input type="checkbox"/> |
| Chemotherapy         | 1 <input type="checkbox"/> | 2 <input type="checkbox"/> | 9 <input type="checkbox"/> |
| Surgery              | 1 <input type="checkbox"/> | 2 <input type="checkbox"/> | 9 <input type="checkbox"/> |
| Other, specify _____ | 1 <input type="checkbox"/> | 2 <input type="checkbox"/> | 9 <input type="checkbox"/> |

b. Second tumour

Localisation \_\_\_\_\_

Hospital \_\_\_\_\_

Year of diagnosis 19|\_|\_|

| Treatment            | Yes                        | No                         | Don't know                 |
|----------------------|----------------------------|----------------------------|----------------------------|
| Radiotherapy         | 1 <input type="checkbox"/> | 2 <input type="checkbox"/> | 9 <input type="checkbox"/> |
| Chemotherapy         | 1 <input type="checkbox"/> | 2 <input type="checkbox"/> | 9 <input type="checkbox"/> |
| Surgery              | 1 <input type="checkbox"/> | 2 <input type="checkbox"/> | 9 <input type="checkbox"/> |
| Other, specify _____ | 1 <input type="checkbox"/> | 2 <input type="checkbox"/> | 9 <input type="checkbox"/> |

3.3 Did your husband (brother, sister, father) ever receive radiotherapy for medical conditions other than those listed in question 3.1 (*check one*)?

- 1  yes
- 2  no
- 9  don't remember

If "yes", please specify:

disease \_\_\_\_\_

hospital, where radiotherapy was received \_\_\_\_\_

year of treatment 19|\_|\_|

3.4 Did your husband (brother, sister, father) ever have any of the following radiodiagnostic procedures (*check "yes", "no" or "don't know" for each procedure; if "yes" enter number of times*)?

| Radiodiagnostic procedure        |                                                         | Number of times |
|----------------------------------|---------------------------------------------------------|-----------------|
| Dental X-ray                     | 1 <input type="checkbox"/> Yes, specify number of times | _ _             |
|                                  | 2 <input type="checkbox"/> No                           |                 |
|                                  | 9 <input type="checkbox"/> Don't know                   |                 |
| Chest X-ray (except fluoroscopy) | 1 <input type="checkbox"/> Yes, specify number of times | _ _             |
|                                  | 2 <input type="checkbox"/> No                           |                 |
|                                  | 9 <input type="checkbox"/> Don't know                   |                 |
| X-ray of bone                    | 1 <input type="checkbox"/> Yes, specify number of times | _ _             |
|                                  | 2 <input type="checkbox"/> No                           |                 |
|                                  | 9 <input type="checkbox"/> Don't know                   |                 |
| Other, specify _____<br>_____    | 1 <input type="checkbox"/> Yes, specify number of times | _ _             |
|                                  | 2 <input type="checkbox"/> No                           |                 |
|                                  | 9 <input type="checkbox"/> Don't know                   |                 |

#### 4. Family information

Please answer the following questions about your family and relatives

4.1 How many brothers and sisters do your husband (brother, sister, father) have? |\_|\_|

4.2 Have any of his first degree blood relatives (parents, brothers, sisters and children) and second degree blood relatives (grand parents, aunts, uncles and grand children) had any of the following thyroid diseases: thyroiditis, goiter, hypothyroidism, hyperthyroidism, thyroid nodules (benign), etc.?

| Relationship to the liquidator         |                                         | Disease | Year of diagnosis |
|----------------------------------------|-----------------------------------------|---------|-------------------|
| Mother                                 | 1 <input type="checkbox"/> Yes, specify | _____   | 19 _ _            |
|                                        | 2 <input type="checkbox"/> No           | _____   | 19 _ _            |
|                                        | 9 <input type="checkbox"/> Don't know   |         |                   |
| Father                                 | 1 <input type="checkbox"/> Yes, specify | _____   | 19 _ _            |
|                                        | 2 <input type="checkbox"/> No           | _____   | 19 _ _            |
|                                        | 9 <input type="checkbox"/> Don't know   |         |                   |
| Other relative, specify _____<br>_____ | 1 <input type="checkbox"/> Yes, specify | _____   | 19 _ _            |
|                                        | 2 <input type="checkbox"/> No           | _____   | 19 _ _            |
|                                        | 9 <input type="checkbox"/> Don't know   |         |                   |

| Relationship to the liquidator   |                                         | Disease | Year of diagnosis |
|----------------------------------|-----------------------------------------|---------|-------------------|
| Other relative, specify<br>_____ | 1 <input type="checkbox"/> Yes, specify | _____   | 19 _ _            |
|                                  | 2 <input type="checkbox"/> No           | _____   | 19 _ _            |
|                                  | 9 <input type="checkbox"/> Don't know   |         |                   |

4.3 Have any of his first degree blood relatives (parents, brothers, sisters and children) and second degree blood relatives (grand parents, aunts, uncles and grand children) ever had any type of cancer: solid cancer or leukemia (check "yes", "no", or "don't know" for each of the relatives). If "yes", indicate the primary localization and the year of diagnosis; enter "don't remember" if the respondent does not remember localization?

| Relationship to the liquidator   |                                         | Localization | Year of diagnosis |
|----------------------------------|-----------------------------------------|--------------|-------------------|
| Mother                           | 1 <input type="checkbox"/> Yes, specify | _____        | 19 _ _            |
|                                  | 2 <input type="checkbox"/> No           |              |                   |
|                                  | 9 <input type="checkbox"/> Don't know   |              |                   |
| Father                           | 1 <input type="checkbox"/> Yes, specify | _____        | 19 _ _            |
|                                  | 2 <input type="checkbox"/> No           |              |                   |
|                                  | 9 <input type="checkbox"/> Don't know   |              |                   |
| Other relative, specify<br>_____ | 1 <input type="checkbox"/> Yes, specify | _____        | 19 _ _            |
|                                  | 2 <input type="checkbox"/> No           |              |                   |
|                                  | 9 <input type="checkbox"/> Don't know   |              |                   |
| Other relative, specify<br>_____ | 1 <input type="checkbox"/> Yes, specify | _____        | 19 _ _            |
|                                  | 2 <input type="checkbox"/> No           |              |                   |
|                                  | 9 <input type="checkbox"/> Don't know   |              |                   |

## 5. Smoking habits

The questions in the following two sections concern the smoking and drinking habits (if applicable) of your husband (brother, sister, father) and have only scientific interest. The answers will be kept confidentially and used only for research.

5.1 Did your husband (brother, sister, father) ever smoke regularly (check one)?

- 1  yes  
2  no (go to question 6.1)

5.2 How old was your husband (brother, sister, father) when he started smoking regularly? \_\_\_\_\_

5.3 How many total years did your husband (brother, sister, father) smoke cigarettes regularly, not counting any periods when he stopped smoking

\_\_\_\_\_

5.4 How many cigarettes (papirosy) did he smoke in a typical day?

\_\_\_\_\_

5.5 What did your husband (brother, sister, father) usually smoke (check all that apply)?

- 
- 1  cigarettes with filter                      3  hand-rolled cigarettes  
 2  cigarettes without filter/paprosy      4  other, specify \_\_\_\_\_

## 6. Alcohol consumption habits

6.1 How often did your husband (brother, sister, father) drink alcohol (*check one*)?

- 1  never                                              4  once a week  
 2  once a month or less                      5  several times a week  
 3  2-3 times a month                      6  every day

If he drank alcohol, please tell me whether he drank the followings and the typical amount he drank per day?

| Beverage                              |                                         | Quantity (ml) |
|---------------------------------------|-----------------------------------------|---------------|
| Beer                                  | 1 <input type="checkbox"/> Yes, specify | _ _ _ _       |
|                                       | 2 <input type="checkbox"/> No           |               |
| Vodka, including samogon <sup>1</sup> | 1 <input type="checkbox"/> Yes, specify | _ _ _ _       |
|                                       | 2 <input type="checkbox"/> No           |               |
| Wine                                  | 1 <input type="checkbox"/> Yes, specify | _ _ _ _       |
|                                       | 2 <input type="checkbox"/> No           |               |
| Other, specify _____                  | 1 <input type="checkbox"/> Yes, specify | _ _ _ _       |
|                                       | 2 <input type="checkbox"/> No           |               |

6.2 Did his alcohol habits change since he returned from the Chornobyl area (*check one*)?

- 1  didn't change                                      4  started drinking after Chornobyl  
 2  drank more                                      5  stopped drinking after Chornobyl  
 3  drank less

---

<sup>1</sup> Home-made spirit

---

## 7. Conclusion

7.1

Thank you very much for answering my questions. Please use the lines below for any additional comments you may have.

---

---

---

---

---

---

---

---

---

---

**Time interview ended:**

hours |\_|\_| minutes |\_|\_|
